# Supplementary material for: Endothelial-like malignant glioma cells in dynamic three dimensional culture identifies a role for VEGF and FGFR in a tumor-derived angiogenic response
Source: PubMed Central journal article supplement (PMC4673156; doi:10.18632/oncotarget.4339), 2015-06-02
Supplement: oncotarget-06-22191-s001.pdf [file oncotarget-06-22191-s001.pdf]

## Endothelial-like malignant glioma cells in dynamic three dimensional culture identifies a role for VEGF and FGFR in a tumor-derived angiogenic response

### Supplementary Material

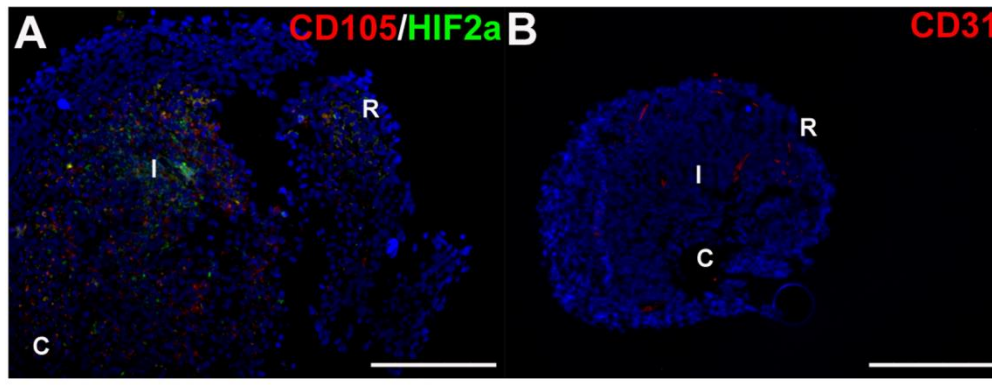

**Supplementary Figure 1: Whole-field RCCS U87 aggregate views of CD105 and CD31 positive cells.** (A) Location of CD105 positive cells in relation to aggregate location and to HIF-2 $\alpha$  positive cells. (B) Location of CD31 positive cells in relation to aggregate location. Aggregate core, rim and interface regions are denoted as *C*, *R* and *I* respectively. *Scale bar* = 200 $\mu$ m.

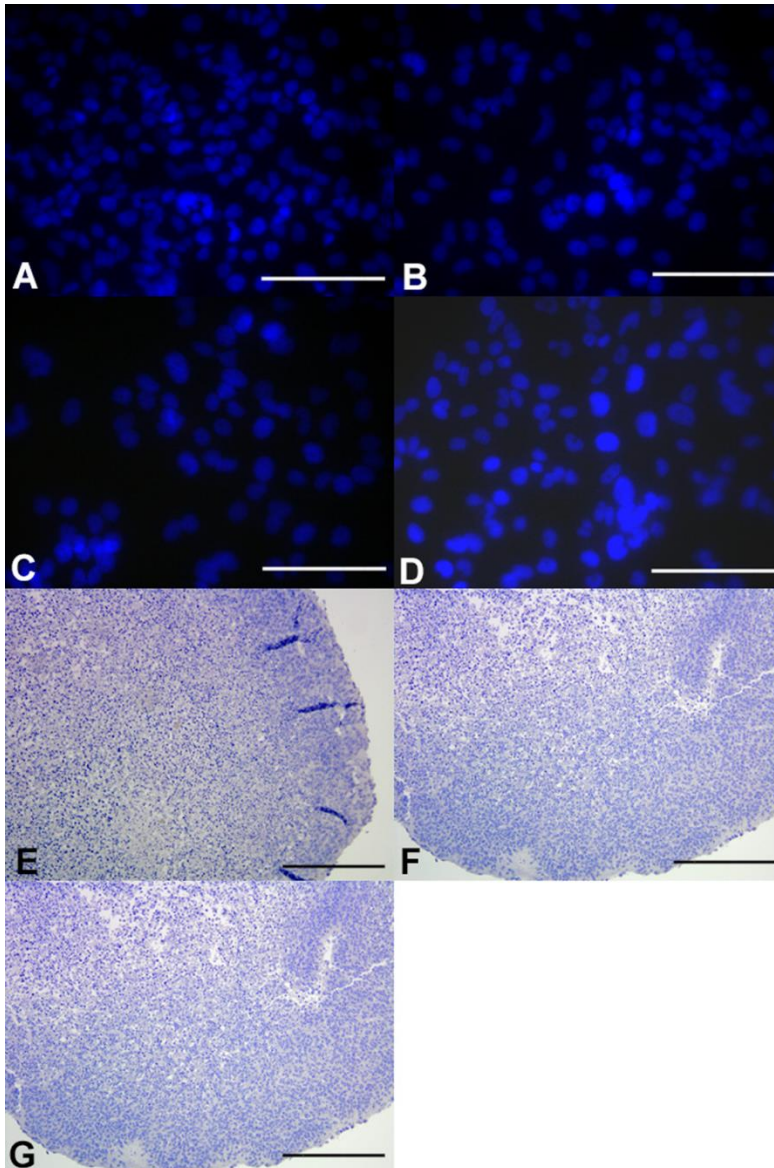

**Supplementary Figure 2: Negative staining for CD105 and CD31 in monolayers and stem cell aggregates (CD31).** (A) Merged image with no positive (red) staining for CD105 on immunofluorescence (IF) of a KNS42 2D monolayer. (B) Merged image with no positive CD105 staining (red) on IF of a U87 2D monolayer. (C) Merged image with no positive CD31 staining (red) on IF of a KNS42 2D monolayer. (D) Merged image with no positive CD31 staining (red) on IF of a U87 2D monolayer. In A-D monolayer cells were cultured for 72 hours prior to staining with either endothelial marker. (E-G) Immunohistochemistry against CD31 on aggregates of ESC (E), NSC (F) and NSC with OCT4 overexpression (G) with no discernible positive staining. *Scale bar A-D = 25 $\mu$ m E-G = 200 $\mu$ m.*

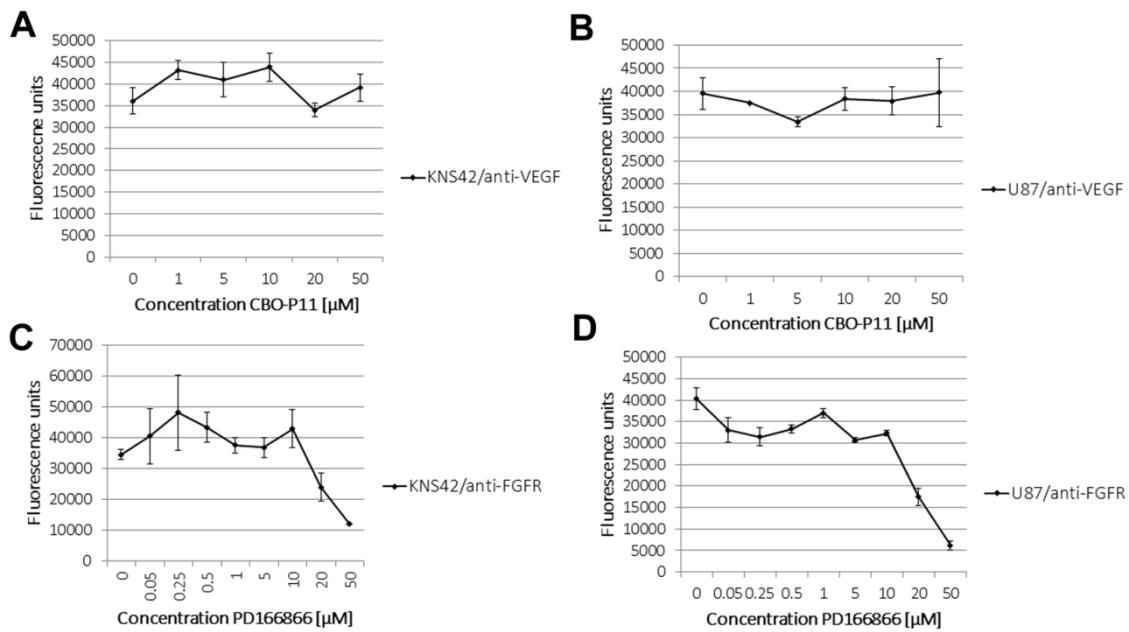

**Supplementary Figure 3: KNS42 and U87 RCCS aggregate viability upon exposure to either VEGF inhibitor (CBO-P11) or FGFR inhibitor (PD166866).** (A-B) Exposure of either glioma aggregate to up to 50  $\mu\text{M}$  VEGF inhibitor resulted in no impairment of cell viability. (C-D) Exposure of either glioma aggregate to FGFR inhibitor, resulted in marked loss of cell viability at concentrations above 10  $\mu\text{M}$ . Based on this data, 15  $\mu\text{M}$  and 10  $\mu\text{M}$  were chosen as VEGF inhibitor and FGFR inhibitor concentrations respectively, by which to monitor anti-angiogenic response without dramatically impairing cell viability.

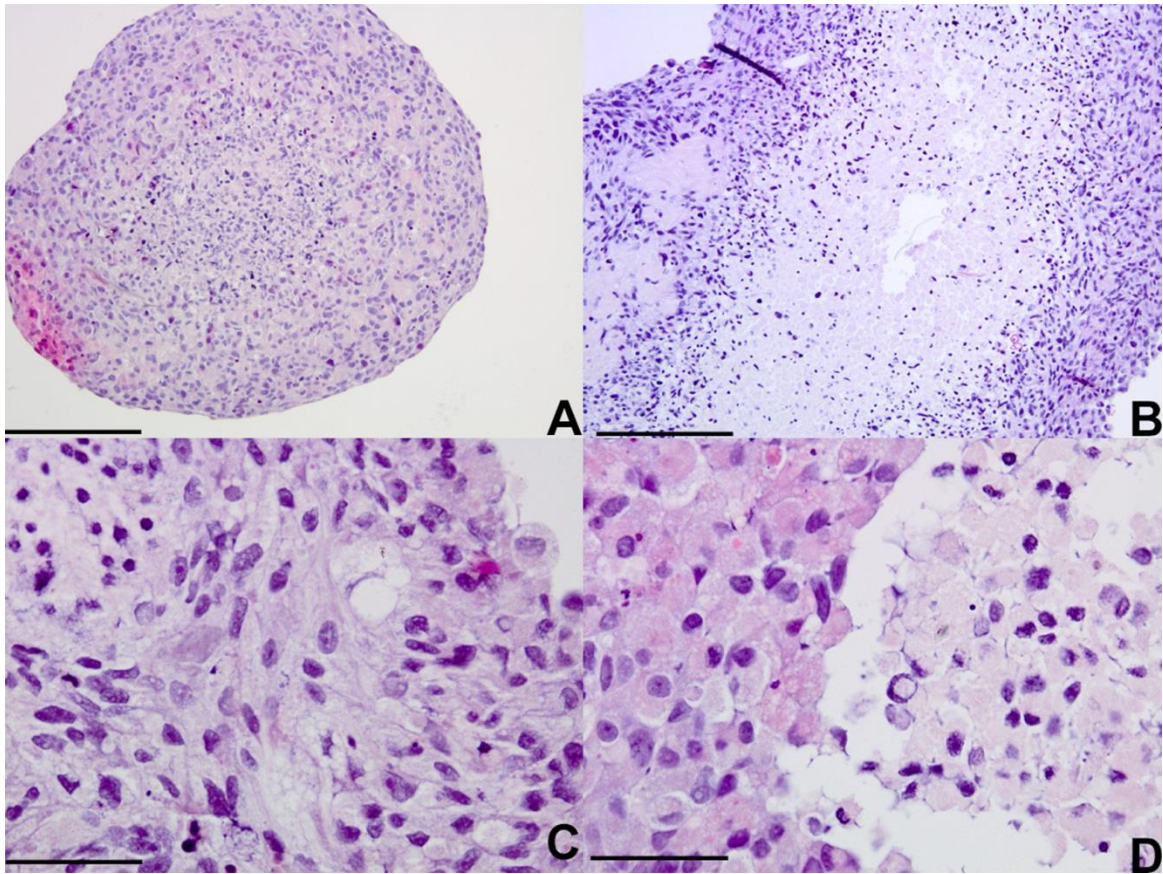

**Supplementary Figure 4: Hematoxylin and eosin stained sections of anti-angiogenic drug treated aggregates.** (A) KNS42 aggregate treated with 15µM PD166866 (FGFR inhibition) (B) KNS42 aggregate treated with 10µM CBO-P11 (VEGF inhibition) (C) U87 aggregate, FGFR inhibition (D) U87 aggregate, VEGF inhibition. *Scale bar A&B = 200µm C&D = 25µm.*

**Supplementary Table 1:** Genes significantly differentially expressed between 3D and 2D

KNS42 GBM cultures.

| <b>Gene</b> | <b>Mean Fold Change 3D to 2D</b> | <b>P value (t-test)</b> |
|-------------|----------------------------------|-------------------------|
| TIMP3       | 402.64                           | 0.0001                  |
| HGF         | 238.86                           | 0.0002                  |
| LEP         | 236.66                           | 0.0004                  |
| IL6         | 208.42                           | 0.0004                  |
| IFNG        | 163.52                           | 0.0001                  |
| PLG         | 158.68                           | 0.0004                  |
| CDH5        | 135.92                           | 0.0006                  |
| VEGFR1      | 135.92                           | 0.0006                  |
| ANGPT1      | 127.70                           | 0.0004                  |
| LECT1       | 113.51                           | 0.0031                  |
| TNF         | 96.56                            | 0.0005                  |
| PTGS1       | 93.05                            | 0.0001                  |
| PF4         | 92.84                            | 0.0005                  |
| CCL11       | 72.50                            | 0.0005                  |
| IFNB1       | 62.68                            | 0.0007                  |
| CXCL9       | 60.97                            | 0.0003                  |
| IFNA1       | 55.72                            | 0.0005                  |
| IGF1        | 51.98                            | 0.0019                  |

|         |       |        |
|---------|-------|--------|
| MMP9    | 47.95 | 0.0002 |
| CXCL5   | 47.07 | 0.0007 |
| CXCL1   | 44.84 | 0.0002 |
| THBS2   | 43.92 | 0.0005 |
| IL8     | 42.71 | 0.0001 |
| CXCL6   | 41.16 | 0.0008 |
| PLXDC1  | 40.04 | 0.0003 |
| IL1B    | 39.21 | 0.0010 |
| MMP2    | 39.12 | 0.0014 |
| ENG     | 38.23 | 0.0008 |
| TEK     | 31.85 | 0.0017 |
| ANGPTL4 | 31.63 | 0.0001 |
| CXCL10  | 27.99 | 0.0006 |
| BAI1    | 22.58 | 0.0002 |
| TGFA    | 22.32 | 0.0006 |
| EREG    | 17.75 | 0.0001 |
| ANPEP   | 16.26 | 0.0000 |
| ANGPTL3 | 14.59 | 0.0001 |
| TYMP    | 14.09 | 0.0000 |
| FIGF    | 13.30 | 0.0001 |
| ANGPT2  | 12.85 | 0.0002 |
| TNFAIP2 | 11.52 | 0.0001 |

|          |       |        |
|----------|-------|--------|
| PROK2    | 11.42 | 0.0001 |
| HAND2    | 9.80  | 0.0001 |
| CXCL3    | 9.51  | 0.0002 |
| VEGFC    | 9.23  | 0.0000 |
| SERPINF1 | 8.28  | 0.0007 |
| EFNA3    | 8.15  | 0.0085 |
| KDR      | 7.67  | 0.0004 |
| PGF      | 6.98  | 0.0001 |
| STAB1    | 6.71  | 0.0001 |
| FGF1     | 6.44  | 0.0001 |
| CD31     | 5.84  | 0.0002 |
| TGFBR1   | 5.44  | 0.0007 |
| HPSE     | 4.88  | 0.0005 |
| PLAU     | 4.71  | 0.0001 |
| NOTCH4   | 4.34  | 0.0000 |
| COL4A3   | 4.12  | 0.0045 |
| EFNA1    | 3.66  | 0.0009 |
| ITGB3    | 3.24  | 0.0002 |
| CCL2     | 3.02  | 0.0002 |
| JAG1     | 2.98  | 0.0003 |
| TIMP1    | 2.10  | 0.0010 |
| EGF      | 1.69  | 0.0509 |

|       |        |        |
|-------|--------|--------|
| PDGFA | -1.51  | 0.0046 |
| THBS1 | -2.03  | 0.0030 |
| TIMP2 | -5.35  | 0.0053 |
| ID3   | -13.12 | 0.0001 |
| ID1   | -46.63 | 0.0013 |



**Supplementary Table 2:** Genes significantly differentially expressed between 3D and 2D

U87 GBM cultures.

| <b>Gene</b> | <b>Mean Fold Change 3D<br/>to 2D</b> | <b>P value (t-test)</b> |
|-------------|--------------------------------------|-------------------------|
| CXCL9       | 143.01                               | 0.00047                 |
| CXCL6       | 97.91                                | 0.00067                 |
| CXCL5       | 87.63                                | 0.00006                 |
| CXCL10      | 79.89                                | 0.00109                 |
| ANGPT1      | 77.53                                | 0.00055                 |
| HGF         | 77.35                                | 0.00008                 |
| TEK         | 76.29                                | 0.00160                 |
| EREG        | 75.93                                | 0.00035                 |
| CXCL3       | 65.19                                | 0.00032                 |
| PF4         | 60.97                                | 0.00057                 |
| FGF1        | 53.69                                | 0.00078                 |
| IFNA1       | 50.45                                | 0.00040                 |
| IL1B        | 46.53                                | 0.00246                 |
| CCL11       | 45.78                                | 0.00026                 |
| FIGF        | 42.22                                | 0.00265                 |
| ANGPTL3     | 39.67                                | 0.00397                 |
| CDH5        | 38.41                                | 0.00038                 |
| IGF1        | 38.23                                | 0.00399                 |
| LEP         | 38.23                                | 0.00092                 |
| TGFBR1      | 37.27                                | 0.00325                 |
| COL4A3      | 36.25                                | 0.00163                 |

|          |       |         |
|----------|-------|---------|
| IFNG     | 34.86 | 0.00179 |
| PLG      | 31.34 | 0.00016 |
| CXCL1    | 28.77 | 0.00079 |
| IFNB1    | 27.28 | 0.00010 |
| ANPEP    | 26.72 | 0.00000 |
| PROK2    | 26.42 | 0.00008 |
| MMP9     | 24.03 | 0.00012 |
| PLXDC1   | 23.97 | 0.00009 |
| VEGFR1   | 22.63 | 0.00022 |
| PTGS1    | 21.11 | 0.00146 |
| TIMP3    | 20.97 | 0.00157 |
| LECT1    | 19.29 | 0.00370 |
| BAI1     | 18.34 | 0.00000 |
| ANGPT2   | 16.56 | 0.00031 |
| KDR      | 16.56 | 0.00020 |
| HPSE     | 15.89 | 0.01141 |
| VEGFC    | 12.24 | 0.00328 |
| TNF      | 11.99 | 0.00041 |
| ANGPTL4  | 11.26 | 0.00139 |
| S1PR1    | 10.29 | 0.00293 |
| STAB1    | 9.51  | 0.00280 |
| THBS2    | 9.40  | 0.01247 |
| SERPINF1 | 9.36  | 0.00920 |
| IL6      | 9.25  | 0.00526 |
| ITGAV    | 9.02  | 0.04540 |
| CD31     | 8.17  | 0.00306 |

|         |       |         |
|---------|-------|---------|
| EGF     | 7.78  | 0.00118 |
| IL8     | 7.29  | 0.00047 |
| EFNA3   | 6.82  | 0.00158 |
| CCL2    | 5.30  | 0.00959 |
| TYMP    | 4.77  | 0.00002 |
| HAND2   | 4.63  | 0.00576 |
| TGFA    | 4.55  | 0.03053 |
| EFNA1   | 3.43  | 0.01364 |
| HIF1A   | 3.14  | 0.06359 |
| FGF2    | 2.85  | 0.01056 |
| NOTCH4  | 2.65  | 0.00216 |
| MDK     | 1.95  | 0.03794 |
| PDGFA   | 1.84  | 0.01370 |
| TIMP1   | -1.54 | 0.02214 |
| FGFR3   | -1.61 | 0.00851 |
| NRP2    | -1.63 | 0.02080 |
| LAMA5   | -1.73 | 0.00209 |
| ITGB3   | -2.20 | 0.00261 |
| PGF     | -2.41 | 0.04214 |
| TGFB1   | -2.50 | 0.00234 |
| COL18A1 | -3.06 | 0.00352 |
| SPHK1   | -3.48 | 0.03321 |
| TNFAIP2 | -3.82 | 0.00106 |
| THBS1   | -4.79 | 0.00102 |
| JAG1    | -5.38 | 0.00007 |
| ID3     | -5.94 | 0.00030 |

**Supplementary Table 3:** Full list of genes differentially expressed between a GBM primary tumor explant T7 / 11 cultured in the RCCS for 3 weeks and a monolayer culture derived from the T7 / 11 explant and cultured for six passages.

| <b>Gene Symbol</b> | <b>T-TEST<br/>p value</b> | <b>Fold Up- or Down-Regulation<br/>Explant : T7/11 2D cell line</b> |
|--------------------|---------------------------|---------------------------------------------------------------------|
| MMP9               | 0.00546                   | 633.265                                                             |
| CXCL3              | 0.00122                   | 227.019                                                             |
| SERPINF1           | 0.00357                   | 143.344                                                             |
| IL8                | 0.00070                   | 73.347                                                              |
| STAB1              | 0.00134                   | 64.000                                                              |
| IL6                | 0.00051                   | 39.854                                                              |
| S1PR1              | 0.00752                   | 32.074                                                              |
| IL1B               | 0.00310                   | 30.274                                                              |
| ID1                | 0.03017                   | 28.907                                                              |
| CXCL10             | 0.00412                   | 22.264                                                              |
| PTGS1              | 0.00083                   | 21.015                                                              |
| EFNB2              | 0.00257                   | 20.773                                                              |
| CD31               | 0.00418                   | 17.794                                                              |
| NRP2               | 0.00286                   | 16.412                                                              |
| NOTCH4             | 0.00090                   | 14.588                                                              |
| HPSE               | 0.00030                   | 14.156                                                              |
| TNF                | 0.00149                   | 13.548                                                              |

|         |         |        |
|---------|---------|--------|
| KDR     | 0.00298 | 13.361 |
| EFNA1   | 0.00819 | 11.158 |
| HAND2   | 0.00415 | 8.938  |
| TNFAIP2 | 0.01356 | 8.320  |
| FGF1    | 0.00537 | 7.078  |
| CXCL1   | 0.00344 | 5.952  |
| TGFBR1  | 0.00149 | 5.789  |
| CXCL5   | 0.00472 | 5.605  |
| CXCL6   | 0.00338 | 4.627  |
| MDK     | 0.04769 | 4.209  |
| TGFA    | 0.00303 | 3.972  |
| LECT1   | 0.02145 | 3.333  |
| EGF     | 0.03119 | 3.102  |
| ANGPTL3 | 0.01316 | 2.502  |
| CDH5    | 0.02852 | 2.109  |
| ITGAV   | 0.00511 | 2.037  |
| FIGF    | 0.02784 | 1.849  |
| PROK2   | 0.01963 | -1.434 |
| COL4A3  | 0.00042 | -1.613 |
| HPRT1   | 0.01101 | -1.625 |
| PF4     | 0.00029 | -1.643 |
| IFNG    | 0.00029 | -1.643 |

|         |         |         |
|---------|---------|---------|
| PLG     | 0.00029 | -1.643  |
| IFNB1   | 0.00029 | -1.643  |
| TIMP3   | 0.00029 | -1.643  |
| EFNA3   | 0.00029 | -1.643  |
| CCL11   | 0.00577 | -1.745  |
| ID3     | 0.04226 | -1.815  |
| VEGFC   | 0.00067 | -1.905  |
| ANGPT2  | 0.00659 | -2.033  |
| PGF     | 0.01513 | -2.178  |
| TIMP2   | 0.00076 | -2.901  |
| HIF1A   | 0.00460 | -3.074  |
| PLXDC1  | 0.00023 | -5.426  |
| PDGFA   | 0.00069 | -5.816  |
| EREG    | 0.00204 | -6.758  |
| JAG1    | 0.00066 | -8.897  |
| THBS2   | 0.00001 | -11.107 |
| ANGPT1  | 0.00040 | -14.254 |
| THBS1   | 0.00001 | -29.582 |
| COL18A1 | 0.00005 | -30.696 |

**Supplementary Table 4:** Genes significantly differentially expressed between HBMEC / KNS42 RCCS co-culture and KNS42 RCCS culture.

| <b>Gene</b> | <b>T-test p value</b> | <b>Fold Up- or Down-Regulation<br/>HBMEC KNS42 / KNS42</b> |
|-------------|-----------------------|------------------------------------------------------------|
| TEK         | 0.001497              | -530.67                                                    |
| TIMP3       | 0.000126              | -498.57                                                    |
| HGF         | 0.000200              | -458.78                                                    |
| S1PR1       | 0.000272              | -457.72                                                    |
| COL4A3      | 0.001531              | -400.32                                                    |
| EGF         | 0.002181              | -350.11                                                    |
| LEP         | 0.000395              | -295.09                                                    |
| ANPEP       | 0.000037              | -279.17                                                    |
| CCL11       | 0.000468              | -262.29                                                    |
| STAB1       | 0.000057              | -246.42                                                    |
| CXCL9       | 0.000238              | -238.58                                                    |
| IFNA1       | 0.000457              | -220.05                                                    |
| PLXDC1      | 0.000283              | -211.57                                                    |
| HAND2       | 0.000053              | -209.62                                                    |
| IFNG        | 0.000147              | -203.89                                                    |
| VEGFR1      | 0.000563              | -203.42                                                    |
| KDR         | 0.000241              | -201.09                                                    |
| PROK2       | 0.000072              | -196.49                                                    |
| PLG         | 0.000383              | -196.49                                                    |
| ANGPT1      | 0.000444              | -173.04                                                    |
| CDH5        | 0.000578              | -168.31                                                    |
| CXCL10      | 0.000512              | -163.33                                                    |

|          |          |         |
|----------|----------|---------|
| CXCL5    | 0.000622 | -162.20 |
| MMP2     | 0.001326 | -150.64 |
| CD31     | 0.000051 | -143.18 |
| LECT1    | 0.003060 | -140.56 |
| IFNB1    | 0.000681 | -137.66 |
| FIGF     | 0.000052 | -129.34 |
| PF4      | 0.000531 | -114.96 |
| FGF1     | 0.000037 | -82.42  |
| TGFB2    | 0.000137 | -64.22  |
| SERPINF1 | 0.000461 | -52.16  |
| CCL2     | 0.000032 | -50.50  |
| ANGPT2   | 0.000160 | -48.67  |
| FGFR3    | 0.000204 | -42.67  |
| NOTCH4   | 0.000007 | -39.44  |
| TGFBR1   | 0.000327 | -37.06  |
| IGF1     | 0.001986 | -30.31  |
| ANGPTL3  | 0.000050 | -22.03  |
| THBS2    | 0.000537 | -16.81  |
| SPHK1    | 0.000201 | -16.55  |
| PGF      | 0.000007 | -15.58  |
| MMP9     | 0.000251 | -13.28  |
| EFNB2    | 0.000129 | -12.71  |
| NRP2     | 0.000155 | -10.79  |
| HPSE     | 0.000304 | -10.40  |
| PDGFA    | 0.000001 | -9.68   |
| EFNA3    | 0.017744 | -7.56   |



|         |          |       |
|---------|----------|-------|
| THBS1   | 0.000018 | -7.24 |
| EPHB4   | 0.001502 | -6.83 |
| IL1B    | 0.001798 | -6.15 |
| PTGS1   | 0.000192 | -4.73 |
| TIMP2   | 0.001354 | -3.34 |
| ITGAV   | 0.000627 | -2.86 |
| B2M     | 0.000534 | -2.58 |
| VEGFC   | 0.000407 | -2.16 |
| IL8     | 0.002520 | -1.78 |
| IL6     | 0.011001 | -1.70 |
| CXCL3   | 0.012173 | -1.51 |
| FGF2    | 0.029402 | -1.48 |
| ID3     | 0.018180 | 1.27  |
| RPL13A  | 0.007627 | 1.52  |
| HPRT1   | 0.012060 | 1.97  |
| HIF1A   | 0.000438 | 1.97  |
| TGFA    | 0.042842 | 2.01  |
| EFNA1   | 0.046569 | 3.14  |
| COL18A1 | 0.023907 | 4.01  |
| EREG    | 0.000002 | 5.16  |
| PLAU    | 0.000065 | 14.95 |
| MDK     | 0.001385 | 15.51 |
| CXCL1   | 0.000047 | 21.28 |
| ID1     | 0.028397 | 30.38 |

**Supplementary Table 5:** Genes significantly downregulated in KNS42 aggregates in response to VEGF inhibition with the VEGF inhibitor CBO-P11 relative to untreated aggregates.

| <b>Gene</b> | <b>P value (t-test)</b> | <b>Fold change VEGF treated/Untreated</b> |
|-------------|-------------------------|-------------------------------------------|
| TIMP3       | 0.000126                | -332.37                                   |
| HGF         | 0.000202                | -240.52                                   |
| LEP         | 0.000398                | -196.72                                   |
| PLXDC1      | 0.000283                | -193.56                                   |
| TEK         | 0.001522                | -182.28                                   |
| CCL11       | 0.000471                | -174.85                                   |
| CXCL9       | 0.000240                | -159.05                                   |
| STAB1       | 0.000057                | -141.37                                   |
| MMP2        | 0.001325                | -141.04                                   |
| VEGFR1      | 0.000568                | -136.87                                   |
| KDR         | 0.000243                | -134.05                                   |
| PROK2       | 0.000072                | -130.99                                   |
| PLG         | 0.000387                | -130.99                                   |
| EPHB4       | 0.000021                | -123.07                                   |
| ANGPTL4     | 0.000066                | -121.66                                   |
| ANGPT1      | 0.000448                | -115.36                                   |
| MMP9        | 0.000189                | -110.41                                   |

|         |          |         |
|---------|----------|---------|
| IGF1    | 0.001806 | -109.90 |
| CXCL5   | 0.000629 | -108.13 |
| TNF     | 0.000495 | -94.79  |
| IFNB1   | 0.000690 | -91.77  |
| IFNG    | 0.000156 | -86.82  |
| EFNA3   | 0.005153 | -84.25  |
| CXCL6   | 0.000761 | -82.71  |
| PTGS1   | 0.000079 | -76.82  |
| PF4     | 0.000539 | -76.64  |
| JAG1    | 0.000007 | -76.29  |
| SPHK1   | 0.000012 | -74.89  |
| CD105   | 0.000791 | -73.35  |
| PLAU    | 0.000043 | -69.87  |
| LECT1   | 0.003163 | -69.87  |
| TGFA    | 0.000552 | -64.00  |
| ANGPTL3 | 0.000046 | -62.97  |
| ANPEP   | 0.000043 | -61.53  |
| BAI1    | 0.000204 | -56.49  |
| THBS2   | 0.000494 | -54.57  |
| IFNA1   | 0.000503 | -53.20  |
| ITGB3   | 0.000010 | -48.39  |
| CXCL10  | 0.000842 | -44.94  |

|          |          |        |
|----------|----------|--------|
| VEGFA    | 0.003592 | -42.91 |
| TNFAIP2  | 0.000040 | -36.50 |
| TYMP     | 0.000004 | -35.10 |
| EREG     | 0.000121 | -34.46 |
| CDH5     | 0.000649 | -34.46 |
| FIGF     | 0.000064 | -33.98 |
| LAMA5    | 0.000002 | -31.49 |
| CD31     | 0.000073 | -30.06 |
| FGF1     | 0.000078 | -28.77 |
| HAND2    | 0.000089 | -26.66 |
| COL18A1  | 0.000680 | -23.32 |
| IL8      | 0.000131 | -20.97 |
| TGFBR1   | 0.000475 | -19.97 |
| IL1B     | 0.001157 | -18.72 |
| FGFR3    | 0.000245 | -18.25 |
| MDK      | 0.002540 | -16.64 |
| CXCL1    | 0.000260 | -16.22 |
| AKT1     | 0.000098 | -12.91 |
| IL6      | 0.000587 | -12.04 |
| ID3      | 0.000080 | -11.52 |
| SERPINF1 | 0.000926 | -11.39 |
| PGF      | 0.000007 | -10.58 |

|        |          |       |
|--------|----------|-------|
| NOTCH4 | 0.000336 | -8.67 |
| ANGPT2 | 0.001329 | -8.32 |
| COL4A3 | 0.007616 | -7.34 |
| TGFB1  | 0.014281 | -6.02 |
| CXCL3  | 0.000763 | -5.84 |
| VEGFC  | 0.001310 | -5.54 |
| TGFB2  | 0.007900 | -5.38 |
| EFNA1  | 0.008076 | -4.26 |
| NRP1   | 0.008571 | -4.13 |
| EGF    | 0.048570 | -4.11 |
| NRP2   | 0.011570 | -4.06 |
| S1PR1  | 0.006910 | -3.92 |
| FGF2   | 0.022892 | -3.60 |
| CCL2   | 0.024887 | -2.54 |

**Supplementary Table 6:** Genes significantly downregulated in KNS42 aggregates in response to FGF inhibition with the FGF receptor tyrosine kinase inhibitor PD166866 relative to untreated aggregates.

| <b>Gene</b> | <b>P value (t-test)</b> | <b>Fold change FGF treated /Untreated</b> |
|-------------|-------------------------|-------------------------------------------|
| TIMP3       | 0.000126                | -411.10                                   |
| HGF         | 0.000201                | -375.67                                   |
| TEK         | 0.001506                | -300.94                                   |
| LEP         | 0.000396                | -243.31                                   |
| PLXDC1      | 0.000282                | -239.41                                   |
| IL6         | 0.000360                | -226.49                                   |
| CCL11       | 0.000469                | -216.27                                   |
| STAB1       | 0.000057                | -203.19                                   |
| CXCL9       | 0.000239                | -196.72                                   |
| MMP9        | 0.000186                | -189.14                                   |
| MMP2        | 0.001318                | -174.45                                   |
| ANPEP       | 0.000038                | -171.65                                   |
| VEGFR1      | 0.000565                | -169.29                                   |
| IFNG        | 0.000147                | -168.12                                   |
| KDR         | 0.000242                | -165.80                                   |
| PLG         | 0.000384                | -162.02                                   |
| ANGPT1      | 0.000446                | -142.68                                   |

|         |          |         |
|---------|----------|---------|
| CDH5    | 0.000581 | -138.78 |
| CXCL6   | 0.000741 | -136.24 |
| IGF1    | 0.001795 | -135.92 |
| CXCL5   | 0.000624 | -133.74 |
| EFNA3   | 0.005070 | -127.70 |
| SPHK1   | 0.000012 | -124.50 |
| CXCL10  | 0.000516 | -123.35 |
| TGFA    | 0.000533 | -117.78 |
| LECT1   | 0.003075 | -115.89 |
| IFNB1   | 0.000684 | -113.51 |
| CD31    | 0.000051 | -111.95 |
| TNF     | 0.000492 | -111.43 |
| EPHB4   | 0.000023 | -107.14 |
| JAG1    | 0.000007 | -100.43 |
| ANGPTL4 | 0.000066 | -95.23  |
| PTGS1   | 0.000078 | -95.01  |
| PF4     | 0.000534 | -94.79  |
| PROK2   | 0.000077 | -92.84  |
| CD105   | 0.000783 | -90.72  |
| IFNA1   | 0.000471 | -85.04  |
| ANGPTL3 | 0.000043 | -79.16  |
| ITGB3   | 0.000010 | -75.06  |

|          |          |        |
|----------|----------|--------|
| THBS2    | 0.000448 | -72.84 |
| BAI1     | 0.000201 | -69.87 |
| PLAU     | 0.000041 | -69.39 |
| FIGF     | 0.000054 | -65.34 |
| ANGPT2   | 0.000154 | -62.39 |
| EREG     | 0.000205 | -60.55 |
| ACTB     | 0.009855 | -58.76 |
| SERPINF1 | 0.000454 | -52.71 |
| IL1B     | 0.001566 | -45.89 |
| TNFAIP2  | 0.000039 | -45.15 |
| TYMP     | 0.000003 | -43.41 |
| HAND2    | 0.000059 | -37.97 |
| TGFBR1   | 0.000330 | -33.36 |
| LAMA5    | 0.000001 | -32.67 |
| FGF1     | 0.000058 | -31.20 |
| IL8      | 0.003057 | -27.47 |
| FGFR3    | 0.000217 | -25.75 |
| CXCL1    | 0.000240 | -24.70 |
| MDK      | 0.001991 | -21.36 |
| COL18A1  | 0.000613 | -20.68 |
| VEGFA    | 0.004169 | -19.70 |
| NOTCH4   | 0.000009 | -17.92 |



|        |          |        |
|--------|----------|--------|
| VEGFC  | 0.000033 | -13.67 |
| PGF    | 0.000006 | -13.09 |
| AKT1   | 0.000070 | -12.24 |
| COL4A3 | 0.002128 | -12.21 |
| CXCL3  | 0.000862 | -11.16 |
| CCL2   | 0.001480 | -7.59  |
| TGFB2  | 0.000242 | -7.38  |
| TGFB1  | 0.000365 | -7.19  |
| S1PR1  | 0.000728 | -7.13  |
| ID3    | 0.000307 | -7.08  |
| GAPDH  | 0.001512 | -6.39  |
| NRP2   | 0.000172 | -5.66  |
| EFNA1  | 0.001015 | -5.64  |
| RPL13A | 0.001966 | -4.97  |
| EGF    | 0.005661 | -4.89  |
| NRP1   | 0.001125 | -4.71  |
| THBS1  | 0.002169 | -4.67  |
| FGF2   | 0.000106 | -4.18  |
| EFNB2  | 0.000675 | -3.56  |
| HPRT1  | 0.021663 | -3.39  |
| PDGFA  | 0.000384 | -3.36  |
| HIF1A  | 0.000113 | -2.68  |

|       |          |       |
|-------|----------|-------|
| TIMP1 | 0.004945 | -2.28 |
| ITGAV | 0.013000 | -1.66 |

**Supplementary Table 7:** Genes significantly differentially expressed between U87 aggregates treated with the VEGF inhibitor CBO-P11 and untreated aggregates.

| <b>Gene</b> | <b>T- test<br/>p value</b> | <b>Fold change U87 aggregates<br/>VEGF treated : Untreated</b> |
|-------------|----------------------------|----------------------------------------------------------------|
| CXCL9       | 0.000468                   | -257.48                                                        |
| CXCL6       | 0.000657                   | -178.73                                                        |
| CXCL5       | 0.000056                   | -156.32                                                        |
| TEK         | 0.001567                   | -127.26                                                        |
| PF4         | 0.000558                   | -111.30                                                        |
| CCL11       | 0.000251                   | -83.58                                                         |
| LEP         | 0.000884                   | -69.79                                                         |
| IGF1        | 0.003818                   | -69.79                                                         |
| IFNG        | 0.001703                   | -63.63                                                         |
| PLG         | 0.000154                   | -57.22                                                         |
| ANPEP       | 0.000001                   | -53.76                                                         |
| EREG        | 0.000360                   | -50.86                                                         |
| PROK2       | 0.000076                   | -48.22                                                         |
| VEGFR1      | 0.000199                   | -41.31                                                         |
| PTGS1       | 0.001339                   | -38.54                                                         |
| TIMP3       | 0.001448                   | -38.28                                                         |
| PLXDC1      | 0.000094                   | -35.88                                                         |
| LECT1       | 0.003394                   | -35.22                                                         |

|          |          |        |
|----------|----------|--------|
| COL4A3   | 0.001669 | -34.50 |
| BAI1     | 0.000003 | -33.47 |
| STAB1    | 0.001811 | -32.11 |
| HGF      | 0.000098 | -26.08 |
| IFNA1    | 0.000434 | -26.08 |
| MMP9     | 0.000137 | -16.93 |
| CD31     | 0.001593 | -15.08 |
| IFNB1    | 0.000140 | -15.05 |
| HAND2    | 0.004711 | -12.08 |
| SERPINF1 | 0.011853 | -7.54  |
| TNF      | 0.000899 | -7.32  |
| FIGF     | 0.004590 | -6.61  |
| ANGPTL3  | 0.008695 | -5.12  |
| ANGPT1   | 0.001543 | -4.68  |
| KDR      | 0.002465 | -4.59  |
| TYMP     | 0.000149 | -4.02  |
| TGFBR1   | 0.015786 | -3.67  |
| EFNA3    | 0.005978 | -3.46  |
| FGFR3    | 0.012908 | -3.06  |
| FGF1     | 0.005092 | -2.98  |
| CDH5     | 0.009445 | -2.76  |
| NOTCH4   | 0.002631 | -2.19  |

|         |          |       |
|---------|----------|-------|
| LAMA5   | 0.029174 | -1.61 |
| EGF     | 0.031802 | -1.47 |
| CXCL10  | 0.025892 | 1.47  |
| TIMP1   | 0.015468 | 1.65  |
| THBS2   | 0.029741 | 2.00  |
| FGF2    | 0.011823 | 2.59  |
| CCL2    | 0.046516 | 2.61  |
| HPRT1   | 0.007114 | 3.34  |
| HIF1A   | 0.002956 | 3.90  |
| B2M     | 0.000197 | 4.51  |
| MDK     | 0.001321 | 4.77  |
| VEGFC   | 0.018316 | 4.82  |
| TNFAIP2 | 0.000078 | 5.25  |
| IL8     | 0.045095 | 10.09 |

**Supplementary Table 8:** Genes significantly differentially expressed between U87 aggregates treated with the FGFR inhibitor PD166866 and untreated aggregates.

| <b>Gene</b> | <b>T-test p value</b> | <b>Fold change U87 aggregates FGF inhibitor : Untreated</b> |
|-------------|-----------------------|-------------------------------------------------------------|
| CXCL6       | 0.000664              | -134.05                                                     |
| CXCL5       | 0.000057              | -116.16                                                     |
| PF4         | 0.000559              | -106.64                                                     |
| CXCL9       | 0.000480              | -102.06                                                     |
| TEK         | 0.001639              | -73.35                                                      |
| CCL11       | 0.000256              | -68.12                                                      |
| IFNG        | 0.001707              | -60.97                                                      |
| LEP         | 0.000898              | -58.22                                                      |
| PLG         | 0.000155              | -54.82                                                      |
| IGF1        | 0.003926              | -52.35                                                      |
| EREG        | 0.000414              | -44.53                                                      |
| TIMP3       | 0.001455              | -36.67                                                      |
| COL4A3      | 0.001911              | -34.78                                                      |
| LECT1       | 0.003449              | -31.41                                                      |
| PTGS1       | 0.001399              | -30.77                                                      |
| VEGFR1      | 0.000217              | -30.70                                                      |
| PROK2       | 0.000114              | -29.72                                                      |
| PLXDC1      | 0.000125              | -28.12                                                      |

|          |          |        |
|----------|----------|--------|
| BAI1     | 0.000005 | -26.72 |
| ANPEP    | 0.000026 | -23.97 |
| HGF      | 0.000165 | -18.17 |
| IFNA1    | 0.000620 | -15.17 |
| STAB1    | 0.007079 | -15.07 |
| MMP9     | 0.000457 | -13.58 |
| CD31     | 0.002812 | -11.90 |
| HAND2    | 0.003938 | -10.53 |
| IFNB1    | 0.000182 | -9.83  |
| TNF      | 0.021794 | -7.45  |
| KDR      | 0.007834 | -5.70  |
| TGFBR1   | 0.020469 | -4.70  |
| SERPINF1 | 0.027681 | -4.66  |
| FIGF     | 0.015243 | -4.63  |
| ANGPTL3  | 0.031742 | -4.26  |
| EFNA3    | 0.040365 | -3.61  |
| ANGPT1   | 0.012551 | -3.25  |
| TYMP     | 0.012601 | -2.26  |
| CXCL10   | 0.005741 | 2.93   |
